# Supplementary material for: Transient monocular blindness and the risk of vascular complications according to subtype: a prospective cohort study
Source: Springer Nature journal article supplement (doi:10.1007/s00415-016-8189-x), 2016-06-17
Supplement: MOESM2 [file 10270268]

## **ELECTRONIC SUPPLEMENTARY MATERIAL**

### **Article title:**

Transient monocular blindness and the risk of vascular complications according to subtype: a prospective cohort study

### **Journal name:**

Journal of Neurology

### **Authors:**

Eline J. Volkers MD, Richard C.J.M. Donders MD, Peter J. Koudstaal MD, Jan van Gijn MD, Ale Algra MD, L. Jaap Kappelle MD

### **Address for correspondence:**

E.J. Volkers, Julius Center for Health Sciences and Primary Care, University Medical Center Utrecht

Internal mail no. Str. 6.131, P.O. Box 85500, 3508 GA Utrecht, The Netherlands

Phone: +31.88.7569626

Fax: +31.88.7568099

Email: [E.J.Volkers@umcutrecht.nl](mailto:E.J.Volkers@umcutrecht.nl)

**SUPPLEMENTARY TABLE 1** History characteristics distinguished in all patients

| Visual field involved                      | Negative symptoms    | Positive symptoms       | Mode of onset/resolution | Speed of onset/resolution | Number of attacks | Duration of symptoms |
|--------------------------------------------|----------------------|-------------------------|--------------------------|---------------------------|-------------------|----------------------|
| Complete                                   | Blurred vision       | Scintillations          | From/to above or below   | One second                | Only one          | <1 minute            |
| Upper or lower half                        | No vision            | Bright field            | From/to left or right    | Seconds                   | 2 to 3            | 1–10 minutes         |
| Central                                    | Completely black     | Flashing lights         | From/to both sides       | 1–5 minutes               | More than 3       | 10–30 minutes        |
| Peripheral                                 | Completely grey      | Jagged lines            | Diagonal                 | 5–10 minutes              | Unknown           | 30 minutes–24 hours  |
| Patchy                                     | Completely white     | Streaks and shimmer     | Diffuse/sudden           | Unknown                   |                   | Unknown              |
| Left or right half                         | Any combination      | Figures                 | Constricting             |                           |                   |                      |
| Three quarters                             | No negative symptoms | Vibration, as with heat | Widening                 |                           |                   |                      |
| One quadrant                               | Unknown              | Completely colored      | Unknown                  |                           |                   |                      |
| Upper and lower half, with central sparing |                      | No positive symptoms    |                          |                           |                   |                      |
| Unknown                                    |                      | Unknown                 |                          |                           |                   |                      |
